# Supplementary material for: Comparing the effects of asynchronous herbivores on New Zealand montane vegetation communities
Source: PLoS One. 2019 Apr 4;14(4):e0214959. doi: 10.1371/journal.pone.0214959 (PMC6448933; doi:10.1371/journal.pone.0214959)
Supplement: S1 Table — (CSV) [file pone.0214959.s001.csv]

Sample	Taxa	Vol	Mass (g)	Spike #	Spike count	Count vol. (mL)	Count mass (g)	Pollen / mL	Pollen / g	Nothofagus fusca-type	Nothofagus menziesii	Dacrydium cupressinum	Dacrycarpus	Podocarpus	Prumnopitys ferruginea	Prumnopitys taxifolia	Phyllocladus	Halocarpus	Metrosideros	Coprosma	Aristotelia fruticosa-type	Myrsine	Neomyrtus-type	Hoheria	Pseudopanax	Griselinia	Coriaria	Hebe	Fuchsia	cf. Carmichaelia	Carpodetus	Gonocarpus	Pimelea	Epacridaceae	Galium	Leucopogon fraseri	Rubus	Muehlenbeckia	Asteraceae	Cardimine	Ranunculus	Oreomyrrhis	Plantago	Mentha	Acaena	Epilobium	Caryophyllaceae	Geranium	Gentiana
Sediment from around coprolites					44					292	9	1				0.01	0.01			29		3		1								3						4	8		3				2	1
A2066	Dinornis	1.25		37166	18	0.000605392		422,866		2				0.01						252																0.01			0.01									0.01
A2070	Dinornis	1.25		37166	7	0.00023543		1,083,123		4		1								240																3
A2064	Dinornis	1.25		37166	41	0.001378949		233,511		27	2	0.01			0.01		0.01	0.01		5	5											28				0.01		40	44	0.01	0.01				1	1	2	0.01
A2063	Dinornis	1.25		37166	14	0.00047086		571,295		13		0.01			0.01					208												0.01	1					25	0.01					0.01		1	1
A2062	Dinornis	1.25		37166	273	0.009181779		28,862		94	4	2			3					112		1	2									1							4							0.01
A2072	Dinornis	1.25		37166	12	0.000403595		807,741		16		0.01								68													0.01					49	1					0.01	131	1
A2109	Dinornis	1.25		37166	100	0.003363289		98,118		131	0.01	0.01		1	0.01			0.01		38	1											3	0.01					59	13						4	0.01	0.01
A2110	Dinornis	1.25		37166	57	0.001917075		163,791		84	6						1			10	1											1	0.01					88	59		2			1	11		1	0.01
A2103	Dinornis	1.25		37166	44	0.001479847		203,399		12	0.01				1					14												5	1					155	21		0.01			2	5	1		0.01
A2102	Dinornis	1.25		37166	41	0.001378949		194,351		5	1				0.01					192																		1	1
A2065	Dinornis	1.25		37166	151	0.005078566		61,238		66	2	1			1					13	2			0.01								1						117	28					0.01	16			3
A2111	Dinornis	1.25		37166	143	0.004809503		60,713		186	11						1			9	6											3	5					7	20		4			1	0.01		1
A2112	Dinornis	1.25		37166	15	0.000504493		656,104		49					0.01					266																		3
A10503	Dinornis	1.5	0.55	37166	81	0.003269117	0.001198676	78,920	215,237	130	5	1		2	1		1			10		2										8	2					37	13		6		1		2	1
A10190	Dinornis	1.5	0.57	37166	12	0.000484314	0.000184039	584,332	1,537,716	15	0.01									144		115
A10189	Dinornis	1	0.36	37166	145	0.003901415	0.001404509	65,105	180,846	228	0.01								0.01	3		2				1		1											1						2
A10530	Dinornis	>1.5	0.67	37166	36		0.00064898		337,452	22										45												6						92	24						7			1
A10199	Dinornis	1.5	0.57	37166	62	0.002502287	0.000950869	99,909	262,917	42	2									5																		152	2						8
A10203	Dinornis	1.5	0.56	37166	32	0.001291503	0.000482161	198,993	533,017	112	1	1					2			6	1	127
A2107	Megalapteryx	1.25		37166	209	0.007029274		38,980		163	6	0.01		1						3												0.01						18	3		2			0.01	0.01		0.01	0.01
A2082	Megalapteryx	1.25		37166	56	0.001883442		200,165		280	6	0.01								16												2						2	5						2			1
A2106	Megalapteryx	1.25		37166	135	0.00454044		73,781		13	1									2	2				1							9	0.01					106	21		2			2	5	0.01	1	1
A2105	Megalapteryx	1.25		37166	21	0.000706291		477,141		35	1					0.01																57						9	27		11			2	4	1	1	2
A10504	Megalapteryx	>1.5	0.6	37166	39		0.000629608		476,487	230	2									30		3																	1						1
A10521	Megalapteryx	>1.5	0.61	37166	17		0.000279018		1,397,757	144	8					1	1			5												13				2		17	65		15				58			1
A10522	Megalapteryx	>1.5	0.69	37166	12		0.000222784		1,113,185	144		0.01								17	66	8																3									1
A10526	Megalapteryx	<1.5	0.49	37166	79		0.001041543		359,083	179	5									44																1		2						1
A10525	Megalapteryx	1.5	0.53	37166	49	0.001977614	0.000698757	132,989	376,383	161	5	2		2						6		49																1			1
A10507	Megalapteryx	<2.0	0.94	37166	22		0.000556423		395,383	17										41		22					23											22			54			4
A10523	Megalapteryx	>1.5	0.73	37166	76		0.001492762		154,077	76		1	1				2			17		64						3										1			1
A10531	Megalapteryx	1.5	0.47	37166	88	0.003551633	0.001112845	92,915	296,537	20	1									24																	1	120	35			3			5			2
A10500	Megalapteryx	1.5	0.51	37166	40	0.001614379	0.000548889	133,178	391,700	4										2								34				3						24	100		1	1	1	1	2			1	1
A10502	Megalapteryx	>1.5	0.65	37166	63		0.001101813		237,790	25										137	29	15										1	2		1	1		16
A10506	Megalapteryx	>1.5	0.62	37166	10		0.000166819		2,217,971	5																	0.01					5						0.01	308		0.01			2			1
A10529	Megalapteryx	>1.5	0.54	37166	14		0.000203412		1,278,196	1																		12				9						2	149		3	1	6	6	1	0.01	1		1
A10193	Megalapteryx	1.5	0.47	37166	72	0.002905882	0.00091051	93,947	299,832	118	2	1					0.01	1		10		114																	1
A10194	Megalapteryx	1.5	0.41	37166	157	0.006336437	0.001731959	52,238	191,113	227	4	1				1	1			9		22
A10196	Megalapteryx	1.5	0.52	37166	101	0.004076306	0.00141312	92,731	267,493	146	6	2								3												29						55	40					11		11	3
A10197	Megalapteryx	>1.5	0.62	37166	25		0.000417048		719,342	23	1			0.01			1			7	4	57					60											22	21		52			0.01
A10198	Megalapteryx	<1.5	0.42	37166	55		0.000621536		469,804	7										1												16						5	15		6				10	1
A2108	Pachyornis	1.25		37166	114	0.003834149		138,492		21	2	1								5												11					0.01	15	283	0.01	0.01	1	1	0.01	3	0.01	2
A2101	Pachyornis	1.25		37166	1	3.36E-05		7,789,994		1	0.01					0.01				0.01												140						16	11					1			0.01	0.01
A2071	Pachyornis	1.25		37166	78	0.002623365		117,406		9	1	1					0.01			2												36						28	40		7			5	7	5		1
A10505	Pachyornis	1.5	0.69	37166	36	0.001452941	0.000668353	163,117	354,603	68	1									21		81																1	2
A10201	Pachyornis	<1.5	0.5	37166	32		0.000430501		501,741	24										24													1					61	10		15			6	7		1
A10508	Pachyornis	>1.5	0.68	37166	22		0.000402518		549,043	22	2				1					15		1					2					4		4				76	33		16
A10192	Pachyornis		0.56	37166	50		0.000753377		342,458	4				1	1					7												2	2	1				74	76		2		1			0.01	1		0.01
A10200	Pachyornis	1.5	0.53	37166	60	0.002421568	0.000855621	95,806	271,148	18	2									70		1										1						68	29				1		3
A10191	Anomalopteryx	2	0.4	37166	55	0.002959694	0.000591939	92,239	461,196	224	2	2					0.01		0.01																				2						3
A10501	Anomalopteryx	2	0.56	37166	38	0.00204488	0.000572566	130,081	464,575	246	4	0.01		0.01		0.01	0.01			3		8		0.01								0.01							0.01						0.01
A10524	Anomalopteryx	2	0.52	37166	60	0.003228757	0.000839477	107,162	412,161	300	1	1					1			2																		2
X10/9/H12	Hare		0.57	37166	1929		0.029584297		6,253																1													74
X10/9/H13	Hare		0.46	37166	1332		0.016486036		5,762	8						1		11																				1	1		1
X10/13/H14	Hare	0.625	0.4	18583	680	0.022870365	0.014637034	11,237	17,558	4																													1				2
X10/13/H15	Hare	1	0.71	18583	1525	0.082064252	0.058265619	3,424	4,823	15								1																					1								15
X10/9/H18	Hare		0.33	37166	1186		0.010530592		2,469	1																												10
X10/13/H20	Hare	1.25	0.52	37166	1333	0.044832643	0.018650379	2,944	7,078	1																												41	1
X10/9/H19	Hare		0.36	37166	1011		0.009792821		4,902	1																												11									1
X10/13/DG16	Ungulate	1.25	0.79	37166	895	0.030101437	0.019024108	8,006	12,668	175	1			1	1			3			2										1
X10/14/DG1	Ungulate	1.25	0.94	37166	765	0.025729161	0.019348329	5,208	6,926	110	8							1								1
X10/11/DG2	Ungulate	1.25	0.3	37166	243	0.008172792	0.00196147	46,496	193,732	204	2			1				1								1	1												2
X10/11/DG3	Ungulate	1.25	0.2	37166	398	0.01338589	0.002141742	24,503	153,146	142	2	1		1	1			2
X10/10/DG4	Ungulate	1.25	0.17	37166	121	0.00406958	0.000553463	88,215	648,643	23	1			1				1				1										6									3			1	1
X10/10/DG5	Ungulate	1.25	0.18	37166	100	0.003363289	0.000484314	74,629	518,259	9								2				2																	1		16				1		1
X10/12b/DG6	Ungulate	1.25	0.26	37166	208	0.006995641	0.001455093	39,167	188,304	154	15			1								1
X10/13/DG21	Ungulate	1.25	1.2	37166	357	0.012006942	0.011526664	21,821	22,730	223																											1	1	1				1
X10/12b/DG32	Ungulate	1.25	0.31	37166	209	0.007029274	0.00174326	36,561	147,425	124	1					1		1
X10/12b/DG30	Ungulate	1.25	0.3	37166	190	0.006390249	0.00153366	42,408	176,702	148	7							1												1
X10/12b/DG?	Ungulate				195					150	10			1	1			2				1
X10/10/DG22	Ungulate	1.25	0.23	37166	63	0.002118872	0.000389872	139,225	756,658	4								1				1																	2		15				5
X10/10/DG23	Ungulate	1.25	0.18	37166	86	0.002892429	0.00041651	94,384	655,447	6								3										2											1		7				8		1
X10/10/DG25	Ungulate	1.25	0.24	37166	76	0.0025561	0.000490771	107,195	558,305	9								2																					1		8				7		1
X10/11/DG26	Ungulate	1.25	0.29	37166	788	0.026502718	0.00614863	10,225	44,075	102	10	1					1	1				1						2											2			1
X10/11/DG27	Ungulate	1.25	0.38	37166	428	0.014394877	0.004376043	22,439	73,811	144	10							1							1														1
X10/12b/DG31	Ungulate	1.25	0.3	37166	268	0.009013615	0.002163268	30,509	127,123	137	18	1						3							1
X10/12b/DG29	Ungulate	1.25	0.27	37166	254	0.008542754	0.001845235	33,596	155,536	156	14			1								1			3
X10/12b/DG28	Ungulate	1.25	0.33	37166	50	0.001681645	0.000443954	206,940	783,865	80	6	1																	1
X10/10/DG24	Ungulate	1.25	0.24	37166	72	0.002421568	0.000464941	122,648	638,791	8																															9				6
[truncated: 25 more columns]
